# Supplementary material for: Loss of mitochondrial ClpP, Lonp1, and Tfam triggers transcriptional induction of Rnf213, a susceptibility factor for moyamoya disease
Source: Neurogenetics. 2020 Apr 28;21(3):187–203. doi: 10.1007/s10048-020-00609-2 (PMC7283203; doi:10.1007/s10048-020-00609-2)
Supplement: Supplementary file 7 — Different sheets summarize fold-changes and p-values for all expression analyses displayed in the diverse figures. (XLSX 21 kb) [file 10048_2020_609_MOESM4_ESM.xlsx]

## Sheet: Figure 1 
b
		Rnf213 fold change	Rnf213 p-value	Lonp1 fold change	Lonp1 p-value	Tfam fold change	Tfam p-value
	ClpP-/- brain	2.41	0.0178	1.02	0.7064	0.96	0.7187
	ClpP-/- heart	2.53	0.0007	1.33	0.5186	1.06	0.7543
	ClpP-/- liver	1.6	0.225	0.85	0.317	1.21	0.4234
	ClpP-/- MEF	3.2	0.0003	1	0.8399	1.04	0.4904
c
		fold change	p-value
	CLPP	0.007	0.0042
	RNF213	4.44	0.0002

## Sheet: Figure 2
	MEF		SH-SY5Y		HUVEC
	fold change	p-value	fold change	p-value	fold change	p-value
Starvation 12h	0.69	0.1603	2.33	0.026	2.46	0.0024
Starvation 24h	0.9	0.3698	2.48	0.0183	3.19	0.0001
Poly(I:C)	37.04	0.0005	1.42	0.0162	18.84	0.0047
LPS	10.21	0.033	0.87	0.0549	1.18	0.4178
IFNG	13.05	0.0113	8.23	<0,0001	5.83	<0,0001

## Sheet: Figure 3
a	MEF
		WT fold change*	WT p-value *	ClpP-/- fold change *	ClpP-/- p-value **	WT vs ClpP-/- p-value
Rnf213	CTRL			3		0.5753
	C16	0.8	0.999	3.15	0.9996	0.4234
	Poly(I:C)	5.57	0.0307	10.86	0.0004	0.0099
	C16 & Poly(I:C)	3.38	0.3972	7.04	0.0613	0.0919
Eif2ak2	CTRL			2.78		0.0078
	C16	0.92	0.9979	2.46	0.891	0.0181
	Poly(I:C)	2.01	0.1652	3.82	0.1508	0.0072
	C16 & Poly(I:C)	1.73	0.4089	3.07	0.9223	0.0374
Ddx58	CTRL			2.14		0.0677
	C16	0.84	0.9843	2.11	>0,9999	0.0408
	Poly(I:C)	2.08	0.106	3.58	0.022	0.0172
	C16 & Poly(I:C)	1.82	0.2783	3.14	0.1419	0.0333
Ifih1	CTRL			6.3		0.8174
	C16	1	>0,9999	6.45	>0,9999	0.8008
	Poly(I:C)	10.23	0.3585	30.31	0.0012	0.0052
	C16 & Poly(I:C)	7.9	0.6012	21.45	0.0511	0.0836
Rsad2	CTRL			8.96		0.9881
	C16	1.03	>0,9999	11.22	0.9998	0.9548
	Poly(I:C)	52.74	0.3237	108.33	0.0175	0.0317
	C16 & Poly(I:C)	35.29	0.6524	69.98	0.2	0.2201
* to WT control
* to ClpP-/- control
b	SH-SY5Y
				Poly(I:C) vs C16 + Poly(I:C)
		fold change	p-value	0.0377
RNF213	C16	0.64	0.065
	Poly(I:C)	1.44	0.0187
	C16 & Poly(I:C)	1.05	0.9841
EIF2AK2	C16	0.88	0.9903	0.0911
	Poly(I:C)	4.61	<0,0001
	C16 & Poly(I:C)	3.62	<0,0001
DDX58	C16	0.69	0.9948	0.379
	Poly(I:C)	12.49	<0,0001
	C16 & Poly(I:C)	10.36	<0,0001
IFIH1	C16	0.85	>0,9999	0.1325
	Poly(I:C)	90.55	0.0003
	C16 & Poly(I:C)	52.18	0.031
RSAD2	C16	0.69	0.9906	0.0029
	Poly(I:C)	8.9	<0,0001
	C16 & Poly(I:C)	4.47	0.0204
c	HUVEC
		fold change	p-value
RNF213	C16	0.9	0.9996	0.6917
	Poly(I:C)	18.84	<0,0001
	C16 & Poly(I:C)	17.63	<0,0001
EIF2AK2	C16	1	>0,9999	>0,9999
	Poly(I:C)	6.95	<0,0001
	C16 & Poly(I:C)	6.95	<0,0001
DDX58	C16	1.16	0.9999	0.0245
	Poly(I:C)	65.34	<0,0001
	C16 & Poly(I:C)	65.1	<0,0001
IFIH1	C16	1.11	>0,9999	0.4229
	Poly(I:C)	131.16	<0,0001
	C16 & Poly(I:C)	121.56	<0,0001
RSAD2	C16	0.8	>0,9999	0.242
	Poly(I:C)	40172	<0,0001
	C16 & Poly(I:C)	32392	0.0001

## Sheet: Figure 4
	ClpP-/- MEF		Tfam+/- MEF		Lonp1+/- MEF
	fold change	p-value	fold change	p-value	fold change
ClpP	0	0.0006	0.92	0.4968	0.99
Tfam	1.04	0.4904	0.86	0.0805	1.1
Lonp1	0.99	0.8399	1.25	0.4586	0.66
Rnf213	3.20	0.0003	5.03	0.0017	1.63
Ifit1	6.78	0.0131	15.93	0.0014	1.33
Ifit3	4.23	0.0024	11.55	0.0079	0.95
Ifi44	11.1	0.0149	26.49	0.0016	3.18
Oasl2	5.6	0.0019	15.9	0.0068	0.96
Ifih1	5.74	0.0001	5.7	0.0145	1.06
Ddx58	1.82	0.0423	2.86	0.0026	1.33
Rsad2	5.78	0.0078	8.97	0.0016	1.15
Trim30a	2.75	0.0105	8.65	0.0111	1.46
Stat1	3.21	0.0039	4.78	0.001	1.13

## Sheet: Suppl. Figure S1
		WT fold change *	WT p-value *	ClpP-/- fold change *	ClpP-/- p-value **	WT vs ClpP-/- p-value
Rnf213	Mock			0.8		>0,9999
	LPS	4.98	<0,0001	9	<0,0001	<0,0001
	Pam3CSK4	0.88	0.9696	1.4	0.1421	0.2586
	CpG	1.59	0.155	2.09	0.0008	0.2911
Ddx58	Mock			0.72		0.7014
	LPS	7.51	<0,0001	10.91	<0,0001	<0,0001
	Pam3CSK4	1.02	0.9971	1.68	0.9675	0.0157
	CpG	1.78	0.9747	2.16	0.8266	0.2682
Rsad2	Mock			1.69		>0,9999
	LPS	110.63	<0,0001	268.83	<0,0001	<0,0001
	Pam3CSK4	2.89	>0,9999	5.96	0.001	>0,9999
	CpG	4.93	0.0064	9.71	<0,0001	>0,9999
* to WT control
* to ClpP-/- control

## Sheet: Suppl. Figure S2
a MEF
		fold change	p-value
Rnf213	FCCP	0.98	0.9448
b SH-SY5Y
		fold change	p-value
RNF213	FCCP 24h	1.03	0.9914
	FCCP 36h	1.05	0.9671
c HUVEC
		fold change	p-value
RNF213	FCCP	2.13	0.0072
